# Supplementary material for: Higher Gestational Weight Gain Is Associated With Increasing Offspring Birth Weight Independent of Maternal Glycemic Control in Women With Type 1 Diabetes
Source: Oxford University Press journal article supplement (doi:10.2337/dc14-0896), 2014-09-10

## SUPPLEMENTARY DATA

**Supplementary Figure 1.** Weekly gestational weight gain given as median (interquartile range) throughout pregnancy in 115 women with type 1 diabetes.

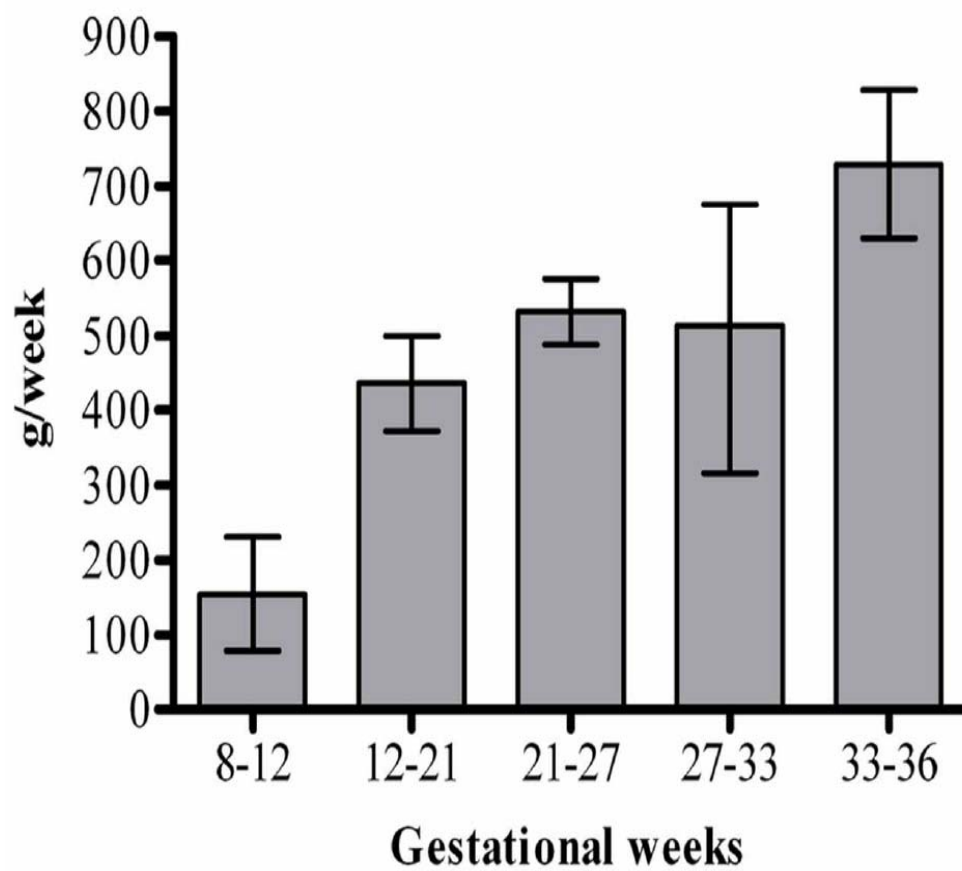

Supplement: dc140896supplementarydata.pdf [file dc140896supplementarydata.pdf]
